# Supplementary material for: A 12-year record of intertidal barnacle recruitment in Atlantic Canada (2005–2016): relationships with sea surface temperature and phytoplankton abundance
Source: PeerJ. 2016 Oct 25;4:e2623. doi: 10.7717/peerj.2623 (PMC5088617; doi:10.7717/peerj.2623)
Supplement: Supplemental Information 1 [file peerj-04-2623-s001.xls]

## Sheet: Data
YEAR	RECRUIT DENSITY (INDIVIDUALS PER SQUARE DECIMETER)	April SST	May SST	April Chl-a	May Chl-a	Air Temperature	Ice (Julian day)	Ice cover (March)	Ice cover (April)	Ice cover (March-April)	Wind ratio
2005	337	1.10254	4.37362	4.8816	5.8626	1.14516	93	80.8333	10.6667	45.75
2006	588	1.96603	8.16466	6.02977	5.76147	2.80323	84	40.6452	3.16667	22.2131
2007	969	2.75996	7.23519	6.89409	6.47625	0.145161	89	48.5	4.33333	26.4167
2008	357	1.12477	7.54501	6.48621	7.78865	-0.8	96	67.5	14.2593	32.439	0.666667
2009	845	0.642827	7.34492	11.4267	6.11022	0.53871	99	92.2581	16.5	55	0.833333
2010	906	3.05257	8.94102	7.75551	13.4745	4.02903	86	43.0645	2.33333	23.0328	1.375
2011	921	2.65023	5.32031	6.85148	6.78224	0.93871	88	20.4839	3	11.8852	1
2012	253	1.98	5.735	9.7875	10.1102	2.87419	77	17	0.5	8.75	1.77778
2013	748	2.085	5.44	10.6096	10.2608	-0.66129	105	67.5806	35.1667	51.6393	1.125
2014	407	0.58	7.155	12.6332	4.23389	0.534483	96	78.7097	20	49.8361	0.818182
2015	198	1.56	5.89	1.39227	11.5921	-2.25667	112	95	47.8333	71.8033	4
2016	750	2.905	6.0625	5.67288	3.07822	0.983871	75	8.70968	2	5.40984	1
